# Supplementary material for: OReFiL: an online resource finder for life sciences
Source: PubMed Central journal article supplement (PMC1976328; doi:10.1186/1471-2105-8-287), 2007-08-06
Supplement: 1471-2105-8-287-S2.pdf [file 1471-2105-8-287-S2.pdf]

## **Stop-words list**

### **A**

about, again, al., all, almost, also, although, always, among, an, and, another, any, are, as, at

### **B**

be, because, been, before, being, between, both, but, by

### **C**

can, could, did

### **D**

do, does, done, due, during

### **E**

e.g. , each, eight, either, enough, especially, et., et al., etc

### **F**

five, for, found, four, from, further

### **H**

had, has, have, having, here, how, however

### **I**

i, i.e., if, in, into, is, it, its, itself

### **J**

just

### **K**

kg, km

### **M**

made, mainly, make, may, mg, might, ml, mm, most, mostly, must

### **N**

nearly, neither, nine, no, nor, not

### **O**

obtained, of, often, on, one, or, our, overall

### **P**

perhaps

**Q**

quite

**R**

rather, really, regarding

**S**

seem, seen, seven, several, should, show, showed, shown, shows, significantly, since, six, so, some, such

**T**

ten, than, that, the, their, theirs, them, then, there, therefore, these, they, this, those, three, through, thus, to, two

**U**

upon, use, used, using

**V**

various, very

**W**

was, we, were, what, when, where, whether, which, while, who, why, with, within, without
